# Supplementary material
Source: publisher figshare collection journal article supplement (https://acs.figshare.com/ndownloader/files/5199076)

## Supporting Information

Amphidinolide Y, a Novel 17-Membered Macrolide from Dinoflagellate *Amphidinium* sp.; Plausible Biogenetic Precursor of Amphidinolide X

Masashi Tsuda<sup>†</sup>, Naoko Izui,<sup>†</sup> Kazutaka Shimbo,<sup>†</sup> Masaaki Sato,<sup>†</sup> Eri Fukushi,<sup>‡</sup> Jun Kawabata,<sup>‡</sup> and Jun'ichi Kobayashi<sup>†,\*</sup>

Graduate School of Pharmaceutical Sciences, Hokkaido University, Sapporo 060-0812, Japan, and Graduate School of Agriculture, Hokkaido University, Sapporo 060-8589

|          |                                                                                                                                       |
|----------|---------------------------------------------------------------------------------------------------------------------------------------|
| S1       | General Methods                                                                                                                       |
| S2       | Table S1                                                                                                                              |
| S3 ~ S10 | Figures S1 ~ S8. 1D and 2D NMR spectra of amphidinolide Y ( <b>1</b> ).                                                               |
| S11      | Figure S9. <sup>1</sup> H NMR spectra of amphidinolide X ( <b>2</b> ) derived from amphidinolide Y ( <b>1</b> ) and natural specimen. |

**General Methods.** NMR spectra except 2D DEPT C–C LR Relay spectrum were recorded on a 600 MHz spectrometer using 2.5 mm micro cells for CDCl<sub>3</sub> (Shigemi Co., Ltd.). Positive mode ESIMS spectra were measured at -80 V as a focus voltage using a sample dissolved in MeOH with flow rate of 200 μL/min. Positive mode FABMS spectra were obtained using nitrobenzyl alcohol as a matrix.

Table S1. Isotope Incorporation Results Based on  $^{13}\text{C}$  NMR Data of Amphidinolide Y (**1**) in  $\text{CDCl}_3$ .

| Positn. | [1- $^{13}\text{C}$ ]-<br>acetate <sup>a</sup> | [2- $^{13}\text{C}$ ]-<br>acetate <sup>a</sup> | Assignment<br>c or m <sup>b</sup> |
|---------|------------------------------------------------|------------------------------------------------|-----------------------------------|
| 1       | 3.56                                           | 1.22                                           | c                                 |
| 2       | 0.87                                           | 1.98                                           | m                                 |
| 3       | 1                                              | 3.12                                           | m                                 |
| 4       | 3.94                                           | 1                                              | c                                 |
| 5       | 1.26                                           | 2.73                                           | m                                 |
| 6       | 0.69                                           | 1.81                                           | m                                 |
| 7       | <sup>c,d</sup>                                 | 1.82 <sup>d</sup>                              | m                                 |
| 8       | 4.14                                           | 1.33                                           | c                                 |
| 9       | 0.93                                           | 2.53                                           | m                                 |
| 10      | 3.93                                           | 0.98                                           | c                                 |
| 11      | 0.60                                           | 2.00                                           | m                                 |
| 12      | <sup>c,d</sup>                                 | 1.68 <sup>d</sup>                              | m                                 |
| 13      | 3.86                                           | 1.36                                           | c                                 |
| 14      | 0.84                                           | 2.47                                           | m                                 |
| 15      | 3.62                                           | 1.23                                           | c                                 |
| 16      | 0.93                                           | 2.91                                           | m                                 |
| 17      | 1.41                                           | 2.32                                           | m                                 |
| 18      | 3.96                                           | 0.87                                           | c                                 |
| 19      | 1.00                                           | 2.79                                           | m                                 |
| 20      | 3.74                                           | 1.16                                           | c                                 |
| 21      | 0.84                                           | 3.02                                           | m                                 |
| 22      | 0.65                                           | 2.44                                           | m                                 |
| 23      | 1.10                                           | 3.10                                           | m                                 |
| 24      | 1.15                                           | 3.09                                           | m                                 |
| 25      | 1.21                                           | 2.90                                           | m                                 |
| 26      | 0.84                                           | 2.42                                           | m                                 |

<sup>a</sup>Intensity ratios of each peak in the labeled **1** divided by that of the corresponding signal in the unlabeled **1**, respectively, normalized to give a ratio of 1 for unenriched peak (C-3 for [1- $^{13}\text{C}$ ]-acetate labeling and C-4 for [2- $^{13}\text{C}$ ]-acetate labeling). <sup>b</sup>denotes the carbon derived from C-1 of acetate, while m indicates the carbon derived from C-2 of acetate. <sup>c</sup>not observed. <sup>d</sup>in  $\text{C}_6\text{D}_6$ .

**Figure S1.**  $^1\text{H}$  NMR spectrum of amphidinolide Y (**1**, 1 mg/40  $\mu\text{L}$ ) in  $\text{CDCl}_3$ .

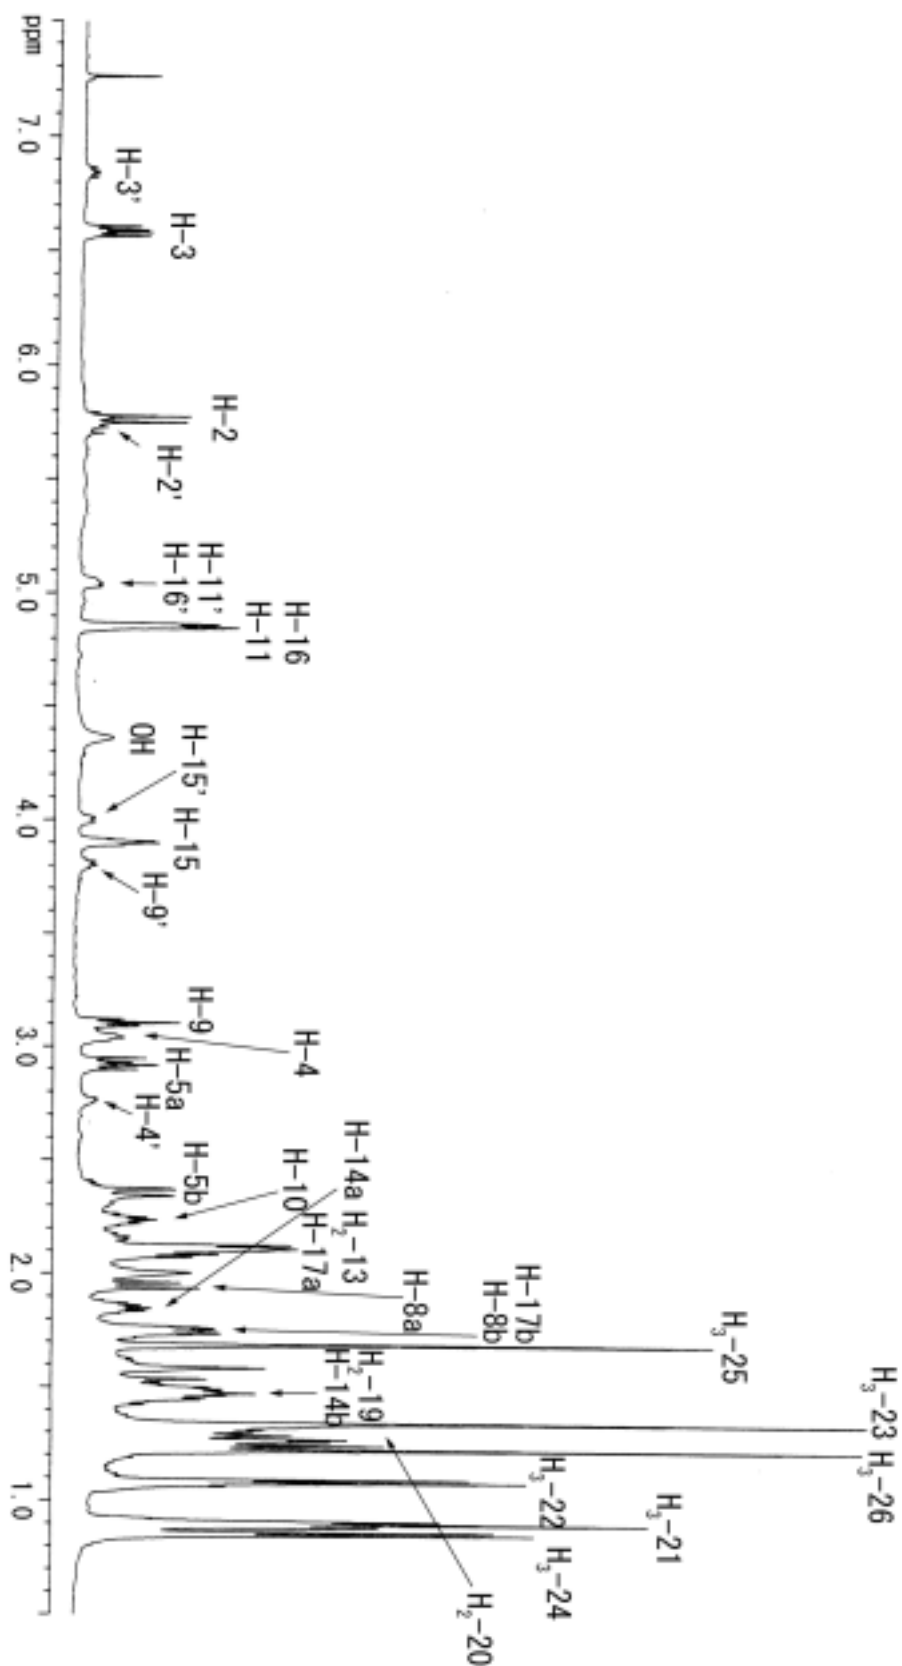

**Figure S2.**  $^{13}\text{C}$  NMR spectrum of  $^{13}\text{C}$ -labeled amphidinolide Y (**1**) in  $\text{CDCl}_3$ .

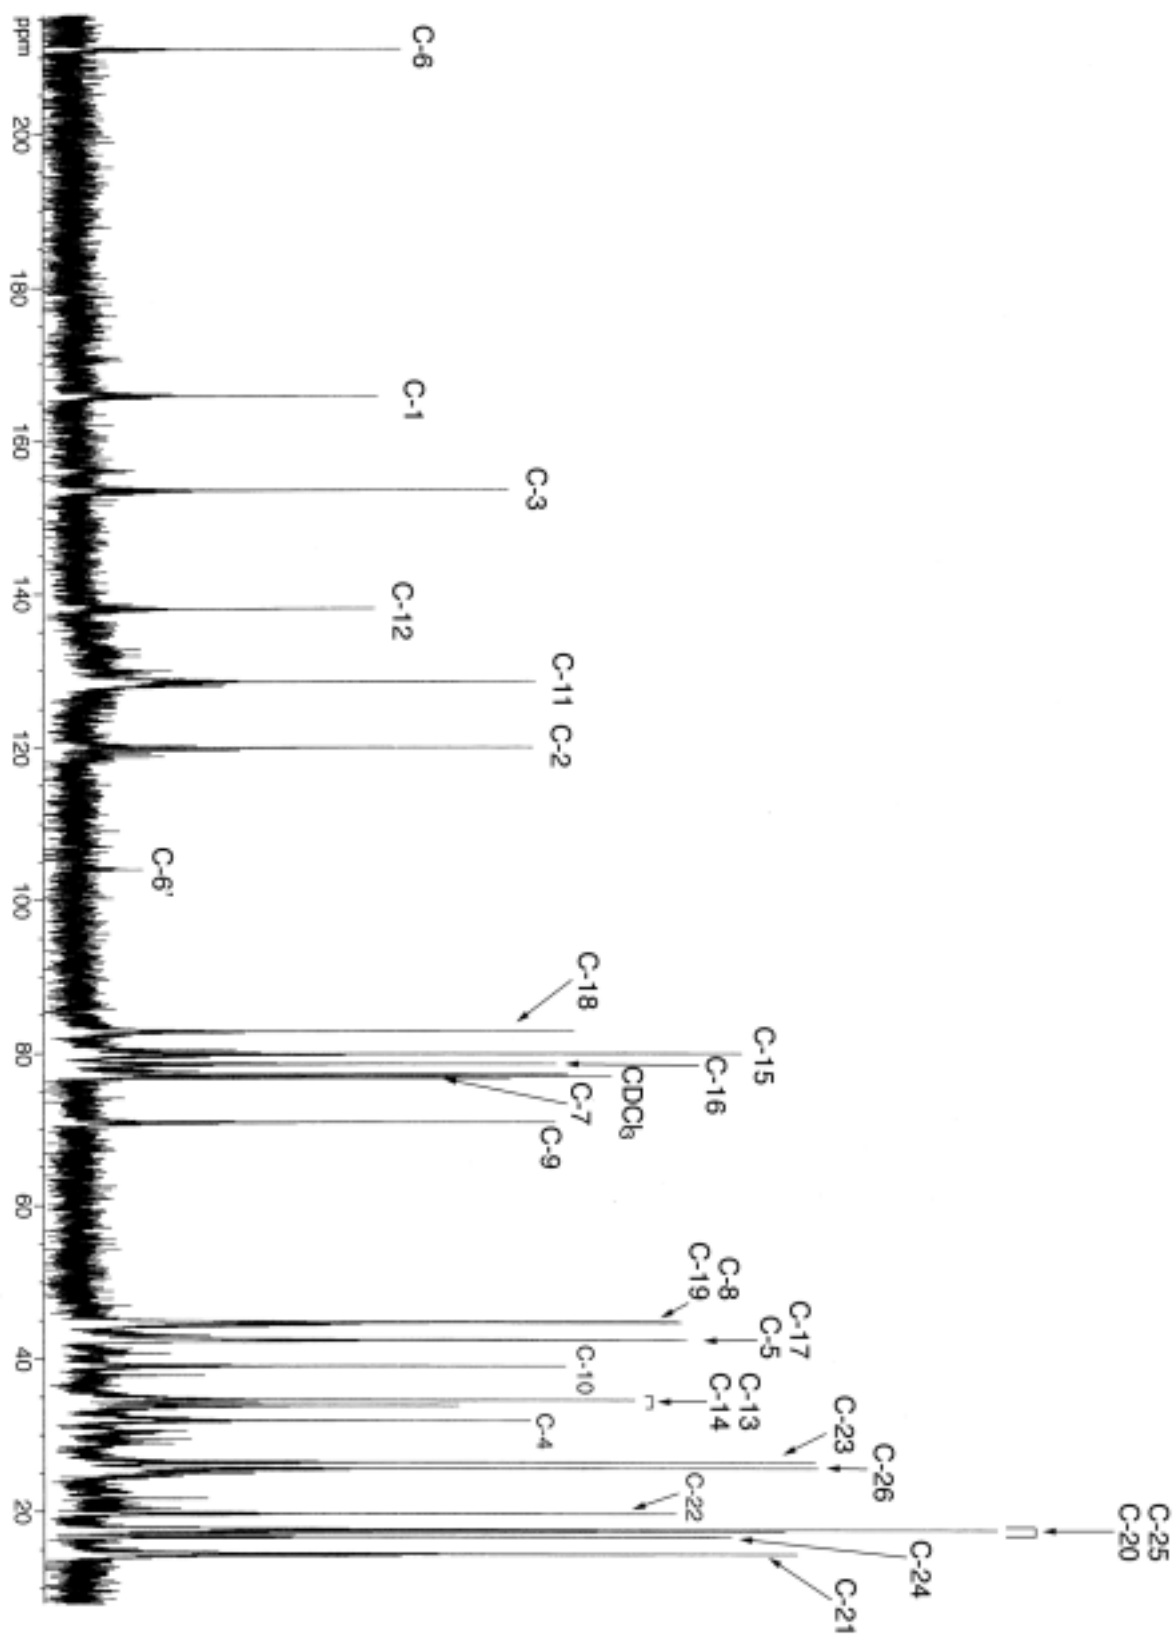

**Figure S3.** DQF COSY spectrum of amphidinolide Y (**1**) in  $\text{CDCl}_3$ .

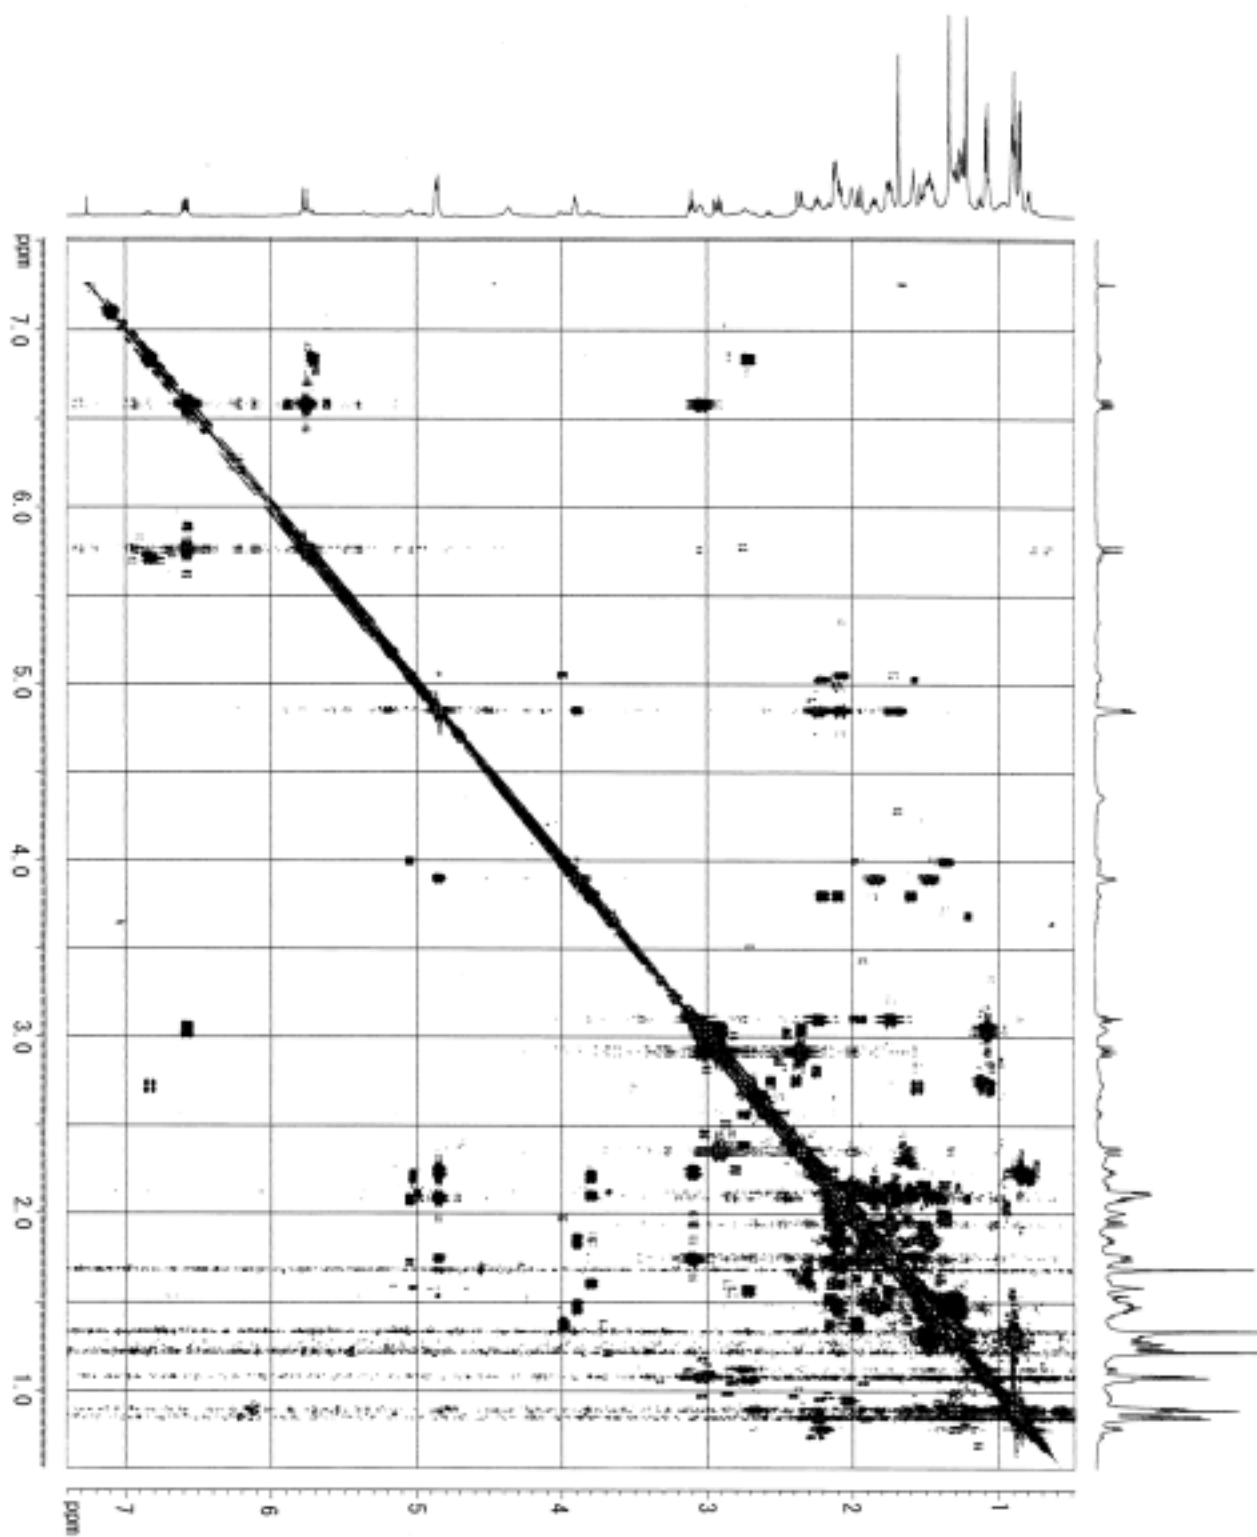

**Figure S4.** HMQC spectrum of amphidinolide Y (**1**) in CDCl<sub>3</sub>.

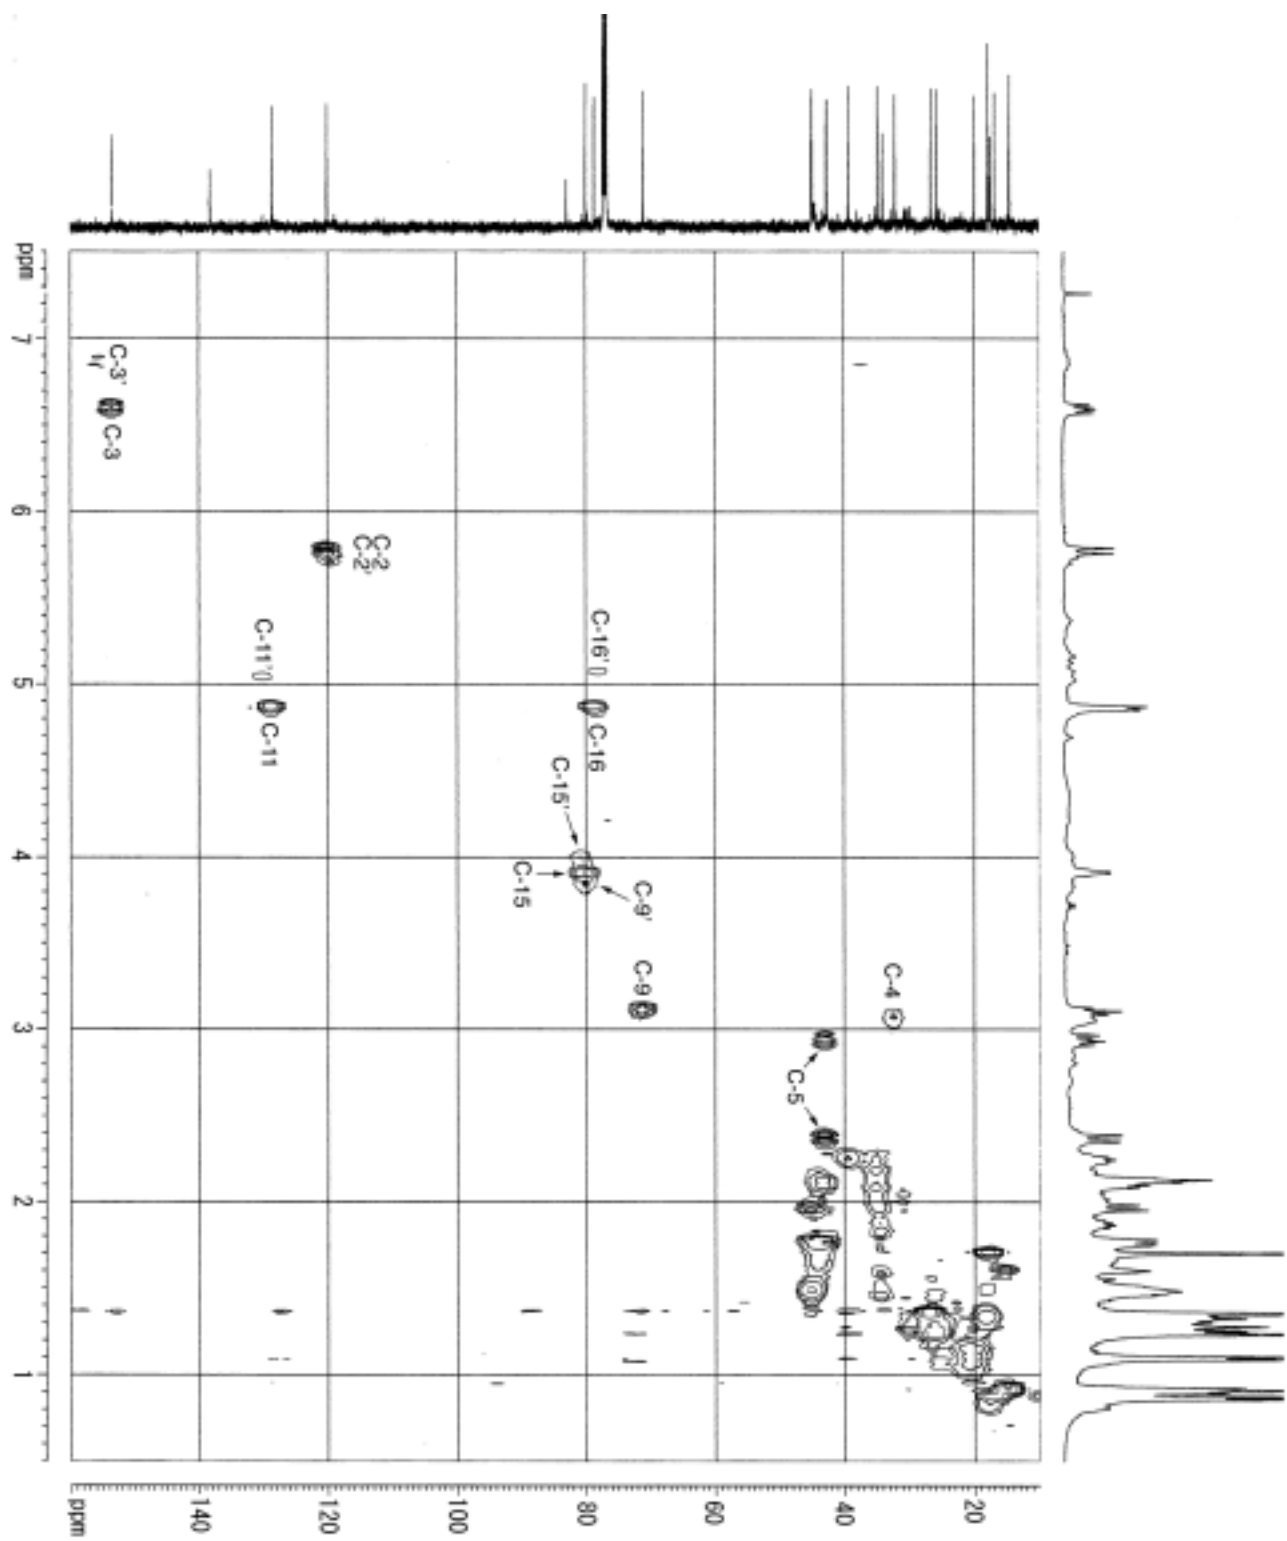

**Figure S5.** HMBC spectrum of amphidinolide Y (**1**) in  $\text{CDCl}_3$ .

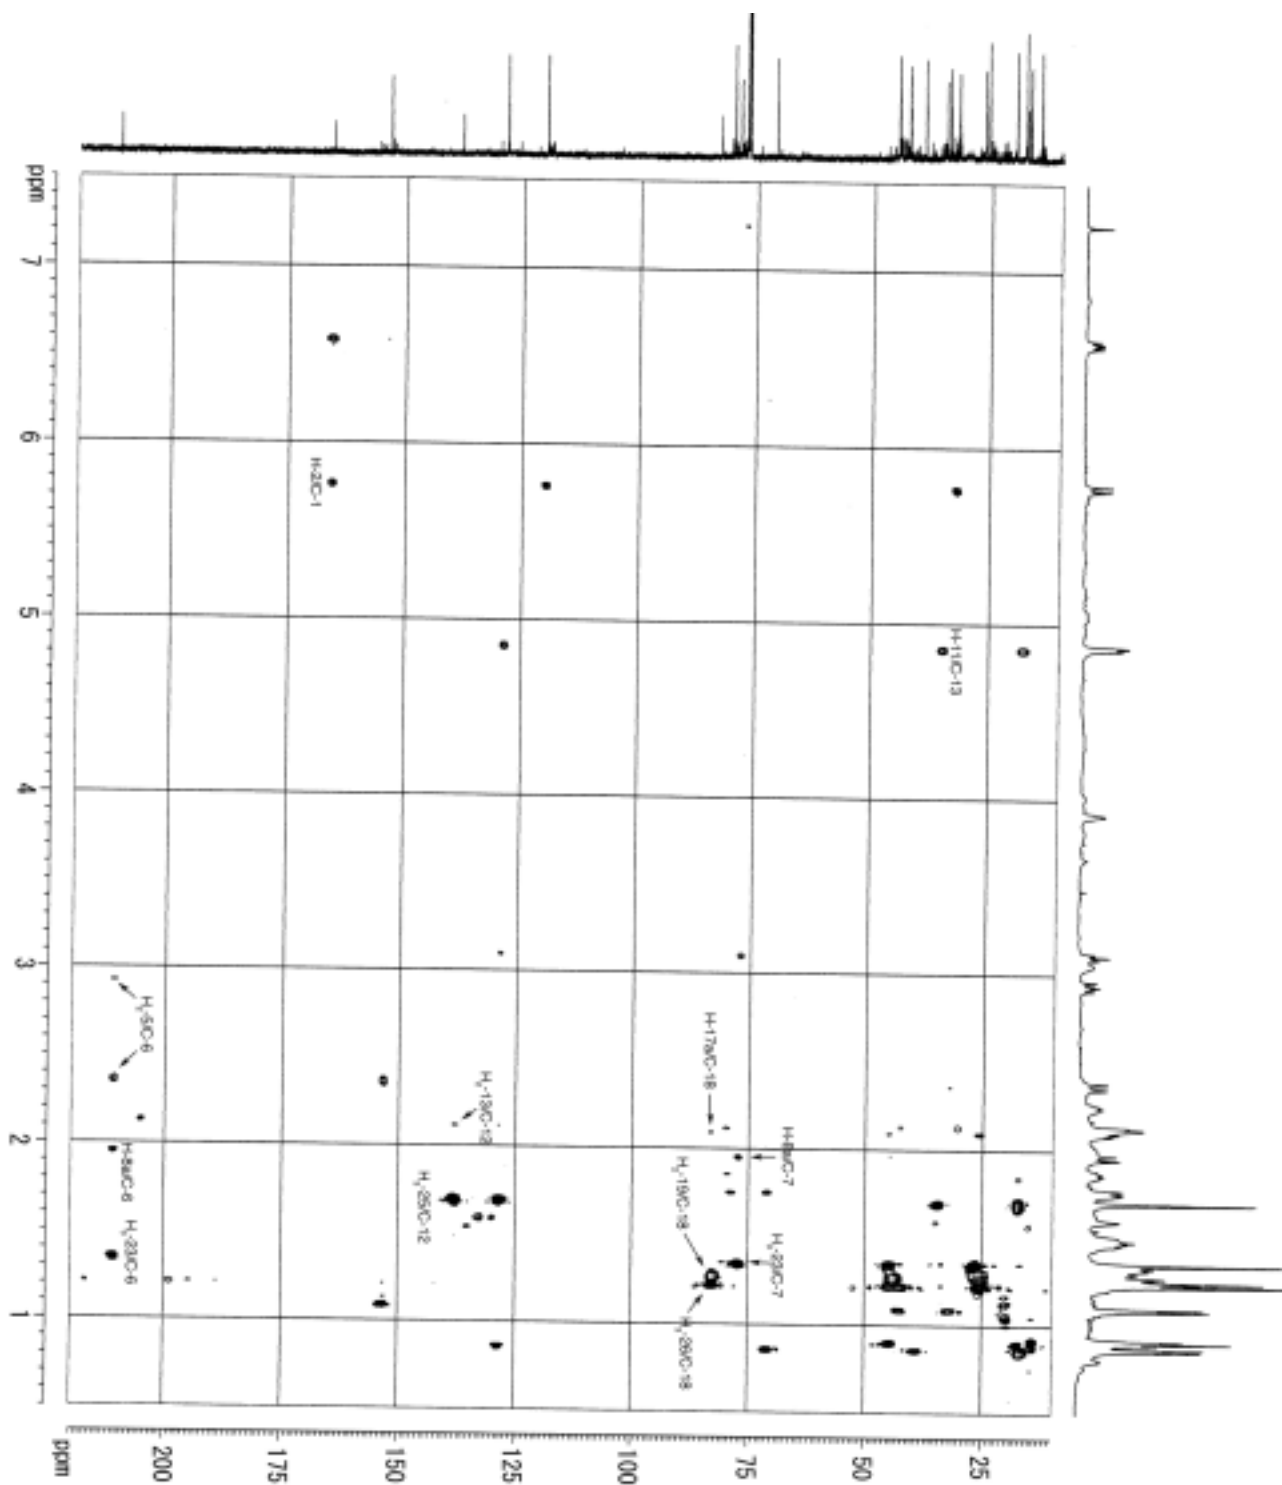

**Figure S6.** NOESY spectrum (positive) of amphidinolide Y (**1**) in CDCl<sub>3</sub>.

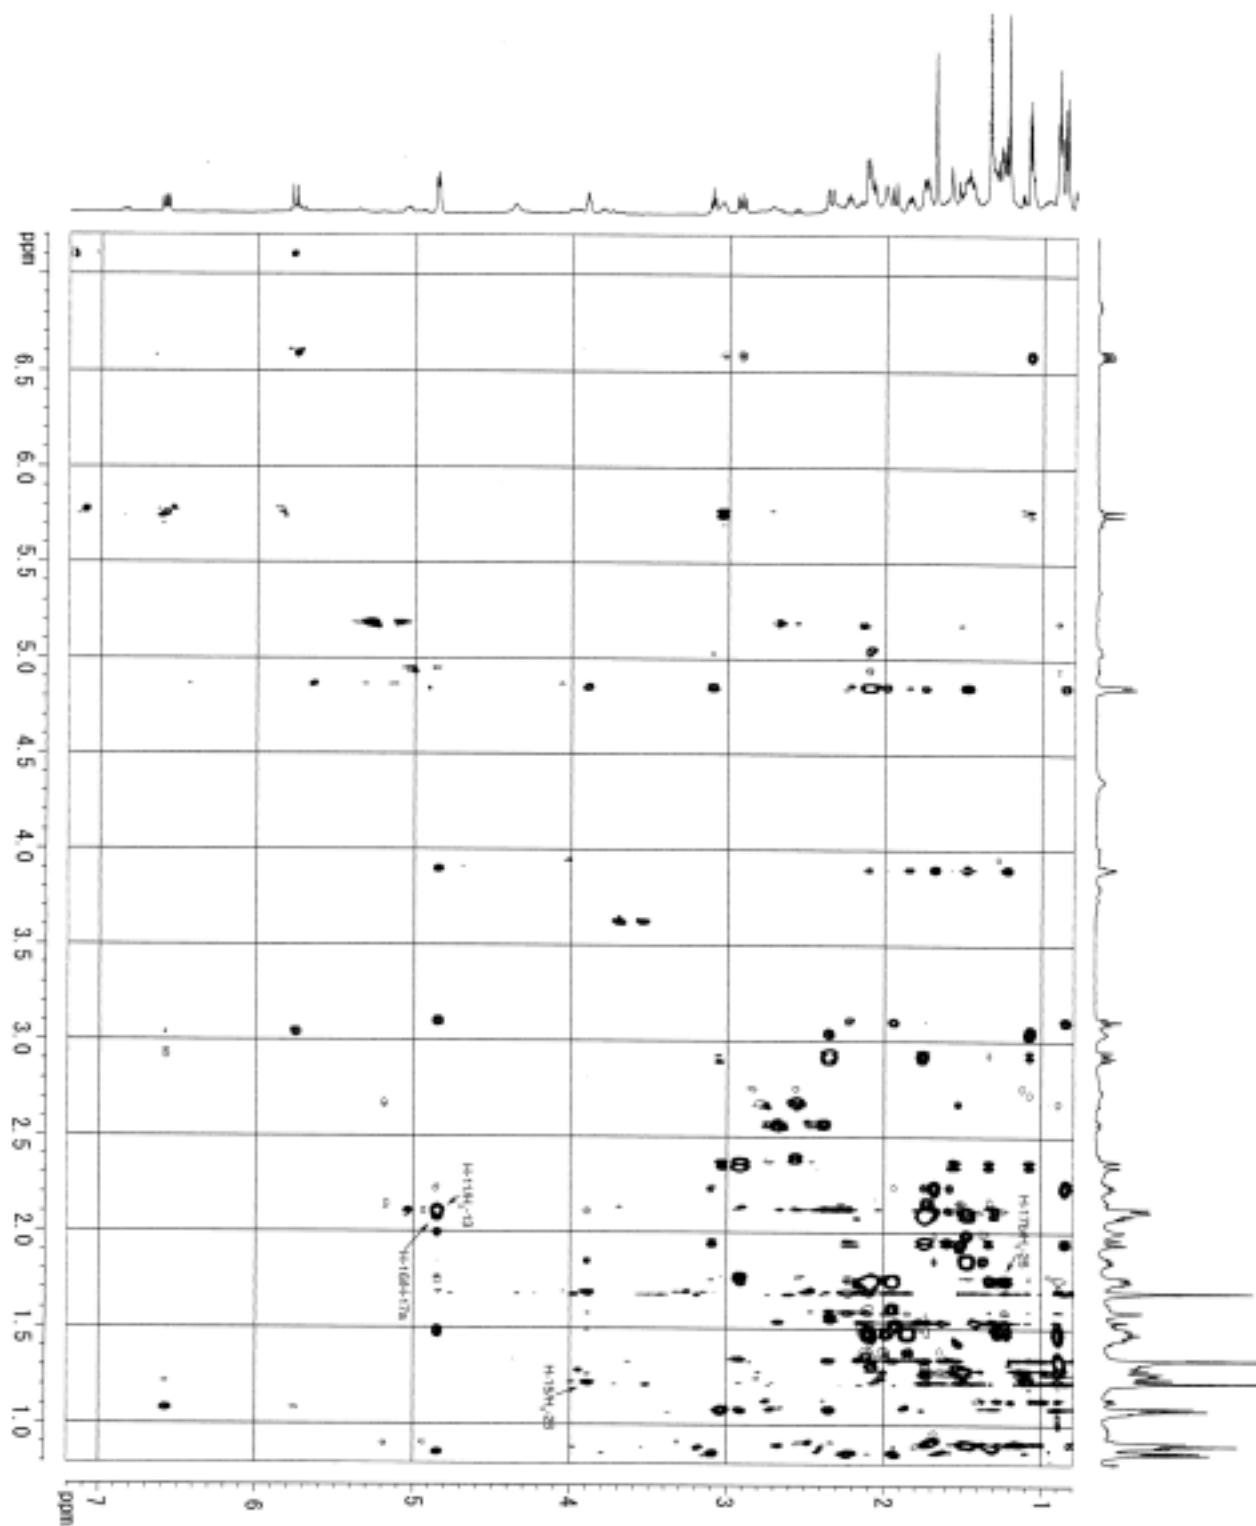

**Figure S7.** NOESY spectrum (negative) of amphidinolide Y (**1**) in  $\text{CDCl}_3$ .

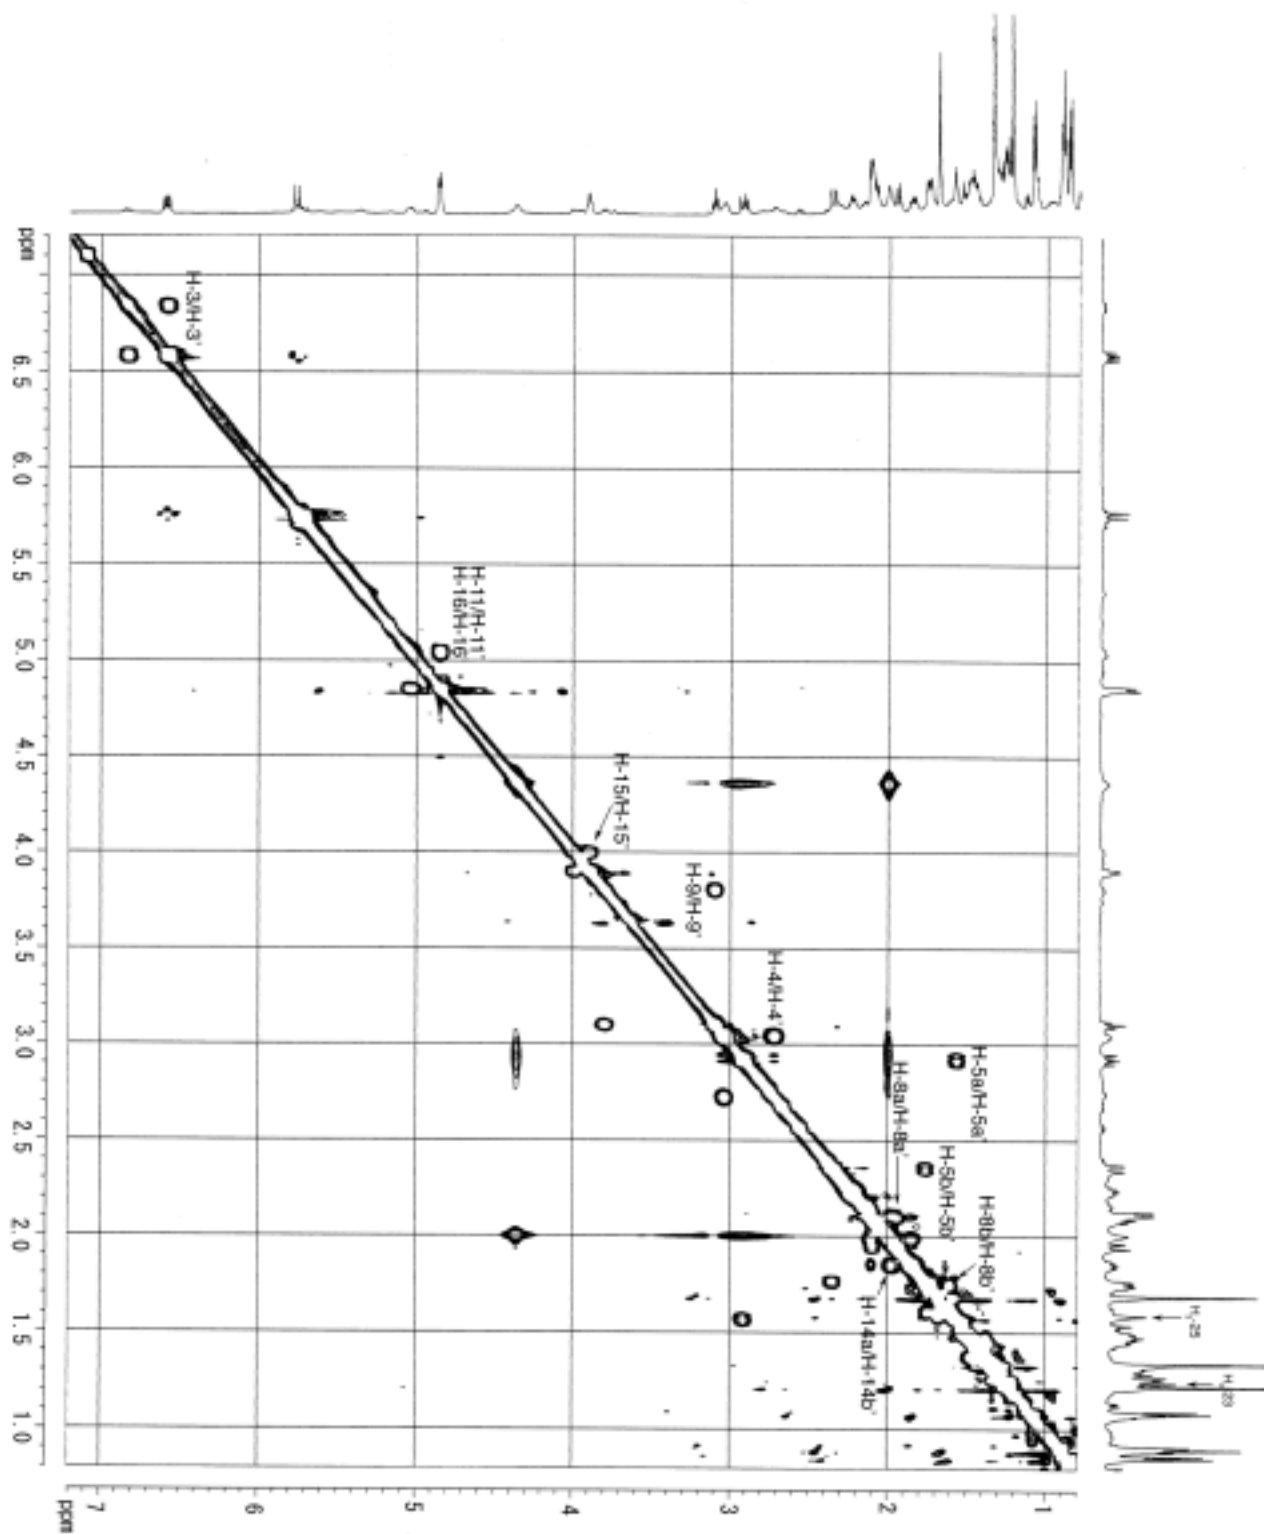

**Figure S8.** 2D DEPT C–C LR Relay spectrum (500 MHz) of  $^{13}\text{C}$ -labeled amphidinolide Y (**1**) in  $\text{CDCl}_3$ .

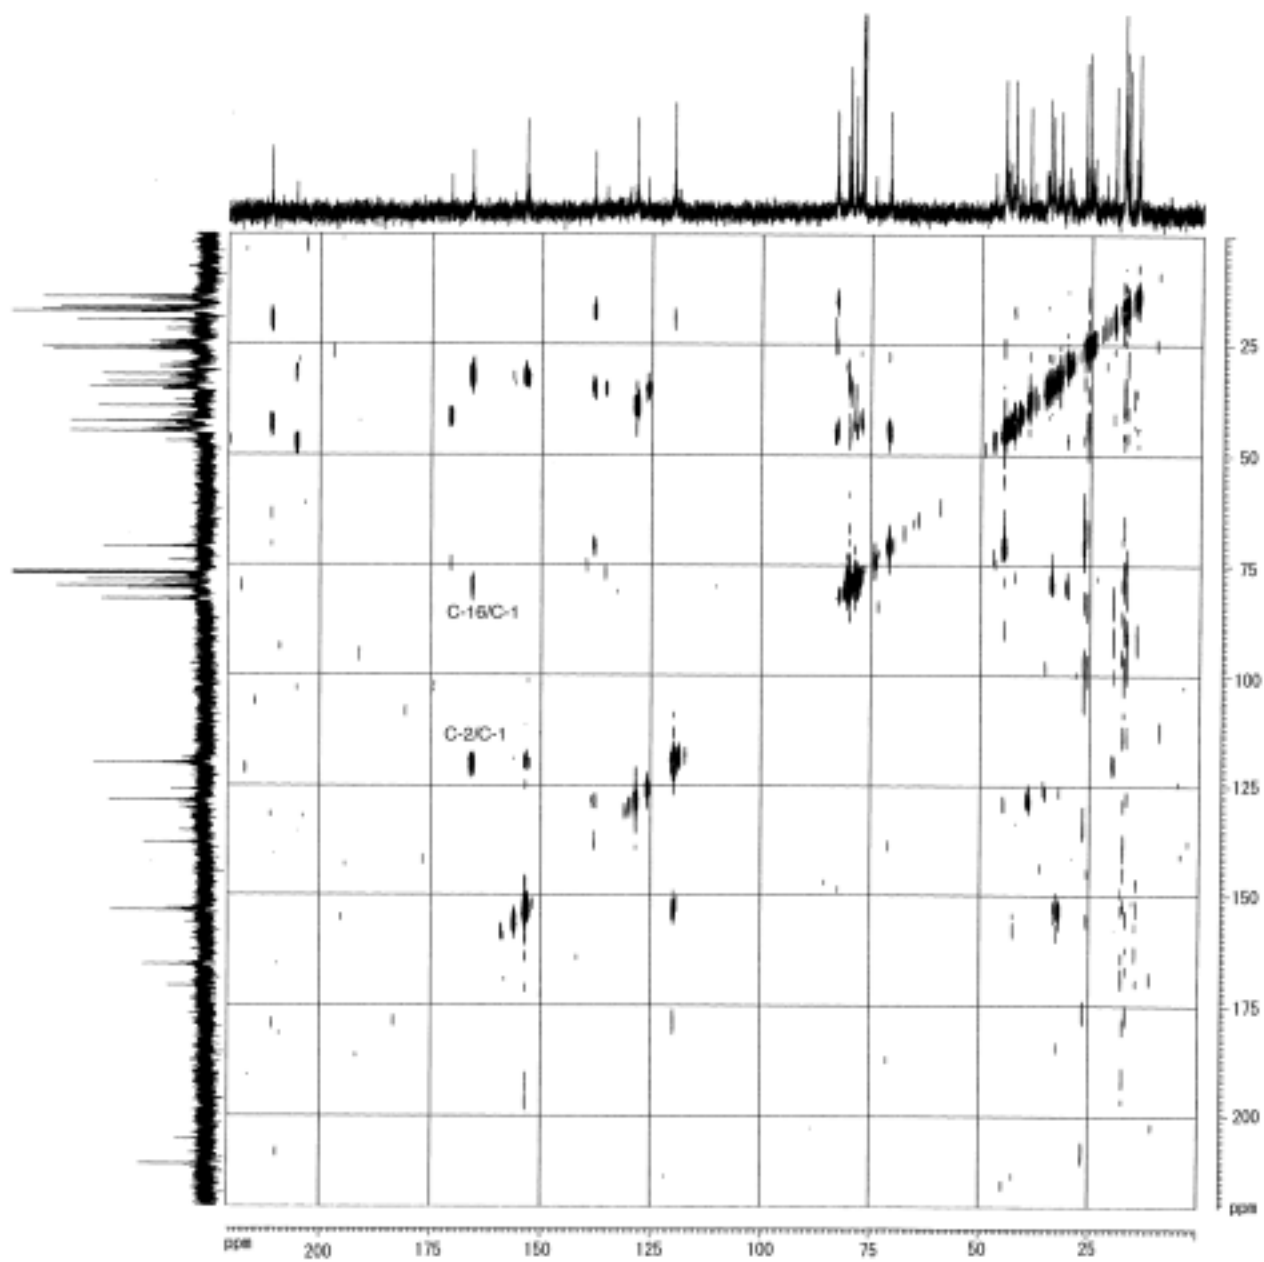

**Figure S9.**  $^1\text{H}$  NMR spectra of amphidinolide X (**2**, red) derived from amphidinolide Y (**1**) and natural specimen (black) in  $\text{CDCl}_3$ .

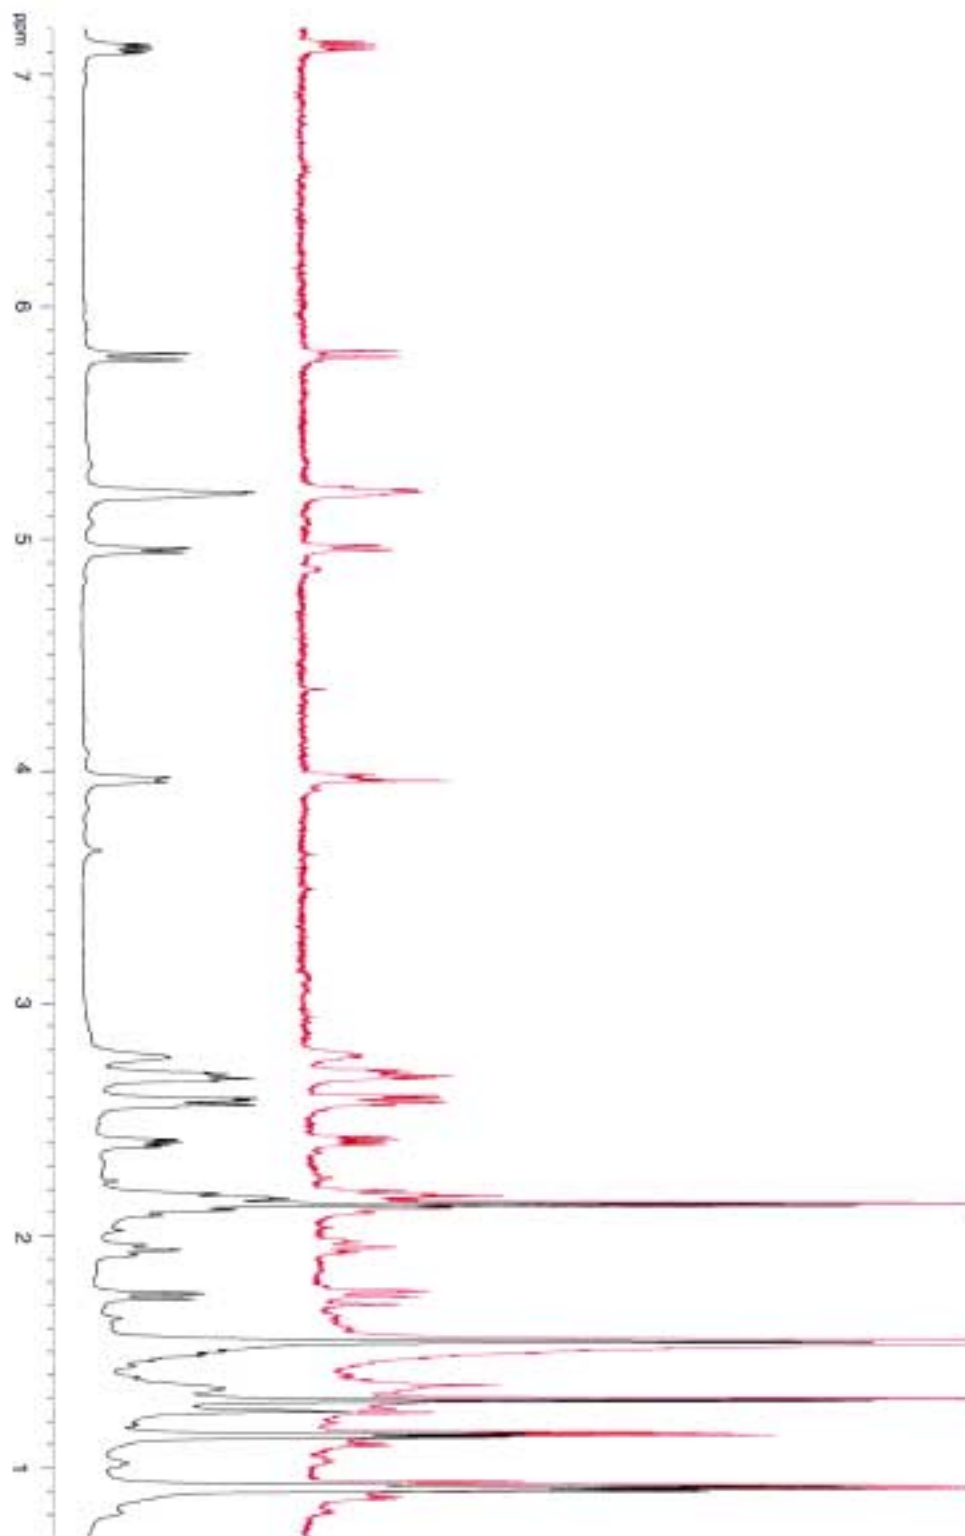

Supplement: Supplementary file 1 [file 5199076]
